# Supplementary material for: Can serum autoantibodies be a potential early detection biomarker for breast cancer in women? a diagnostic test accuracy review and meta-analysis
Source: Research Square preprint supplement (doi:10.21203/rs.3.rs-623988/v1), 2021-06-18
Supplement: Supplementary file 2 [file f7a4b3dd0112dc38c9e20905.docx]

*Article title:*

Serum autoantibodies as new generation biomarkers for early detection of breast cancer in women: a diagnostic test accuracy review and meta analysis

*Journal name:*

Clinical and Translational Oncology

*Author names:*

Thejas R Kathrikolly, Sreekumaran N Nair, Aju Mathew, Prakash PU Saxena, Suma Nair

*Affiliation and e-mail address of the corresponding author:*

Department of Community Medicine & Centre for Community Oncology, Kasturba Medical College, Manipal, Manipal Academy of Higher Education (MAHE), Manipal, India

e-mail: suma.nair@manipal.edu

Characteristics of excluded studies

| Studies not meeting the inclusion criteria | 66 |
| --- | --- |
| Book chapter | 2 |
| Narrative reviews | 36 |
| *Total* | *104* |
